# Supplementary material for: How wind speed shear and directional veer affect the power production of a megawatt-scale operational wind turbine
Source: Copernicus journal article supplement (doi:10.5194/wes-2019-86), 2019-12-04
Supplement: Supplementary file [file wes-2019-86-AC2-supplement.pdf]

The reviewer's comment is in black, the author's comment is in red.

The authors appreciate the time spent reviewing and the thought put into the positive comments. Additionally, we are grateful that detail in sections (such as data filtering) was useful and of interest to the reviewer.

The paper discusses the effect of wind shear and veer as well as atmospheric stability on the power production in the partial load region of wind turbines. The analysis is based on real measurement data. The authors use different methods to describe the wind field situation across the turbine swept area. The description of the used data and data handling e.g. filtering is very detailed. It is interesting to see, that the usable data drops down to 30% of the available data and also reflects the difficulties to perform such investigations based on real data where the inflow conditions can not be controlled and repeated, respectively.

The paper is well written and easy to read even though there are many aspects touched in this paper. The results are nicely summarized and put into context with other findings. I have no suggestions on how this paper could be improved, good work.
